# Supplementary material
Source: PubMed Central journal article supplement (PMC2234106)
Supplement: pnas_0710643105_3.pdf [file pnas_0710643105_3.pdf]

1eq. **7a** (L=H) or **7b** (L=D) / 0.95 eq. **11**

79%  $\downarrow$  2eq. CuI, 2eq. NaI, 1.5eq. K<sub>2</sub>CO<sub>3</sub> / DMF

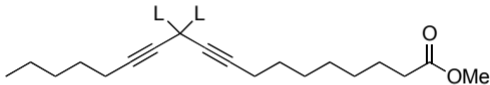

**12a** (L=H), **12b** (L=D)

57%  $\downarrow$  1.) catecholborane, 1.5 eq.  
2.) HOAc (10 eq.)  
3.) 30% KOH, reflux

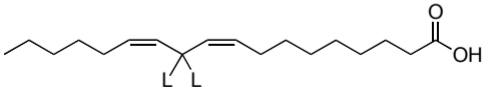

**13a** (L=H), **13b** (L=D)
