# Supplementary material
Source: PubMed Central journal article supplement (PMC2234106)

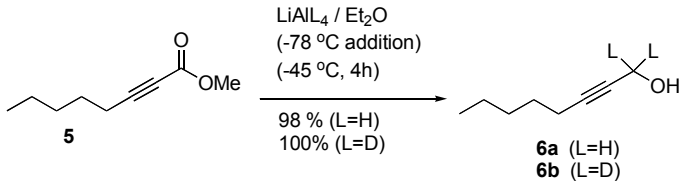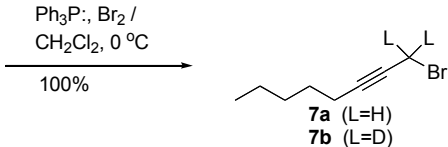

Supplement: pnas_0710643105_1.pdf [file pnas_0710643105_1.pdf]

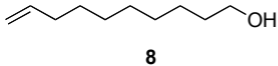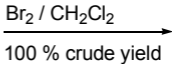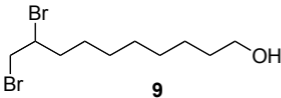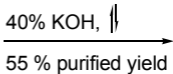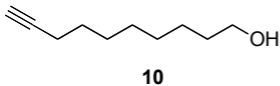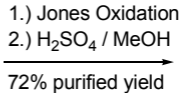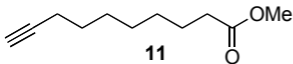

Supplement: pnas_0710643105_2.pdf [file pnas_0710643105_2.pdf]
